# Supplementary material for: Carotenoid radical formation after multi-photon excitation of 8′-apo-β-carotenal
Source: Royal Society of Chemistry journal article supplement (doi:10.1039/d4cp04373a), 2025-01-01
Supplement: d4cp04373a1.pdf [file d4cp04373a1.pdf]

## Supporting Information

### **Carotenoid radical formation after multi-photon excitation of 8'-apo- $\beta$ -carotenal**

*Václav Šebelík, Valentyna Kuznetsova, Ivana Šimová, Tomáš Polívka\**

Department of Physics, Faculty of Science, University of South Bohemia, Czech Republic

Corresponding author: [tpolivka@prf.jcu.cz](mailto:tpolivka@prf.jcu.cz)

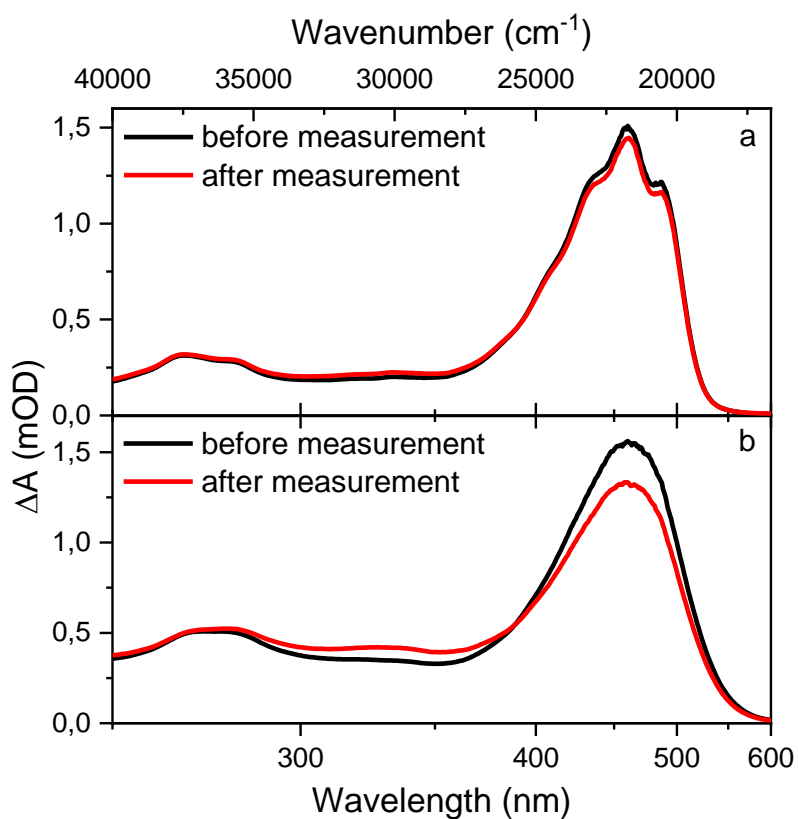

**Fig. S1** Comparison of the steady-state absorption spectra of the  $\beta$ -apo-8'-carotenal in (a) *n*-hexane and (b) methanol before and after the 1300 nm multi-photon excitation experiments. Both samples were excited by the 15 mW pump.

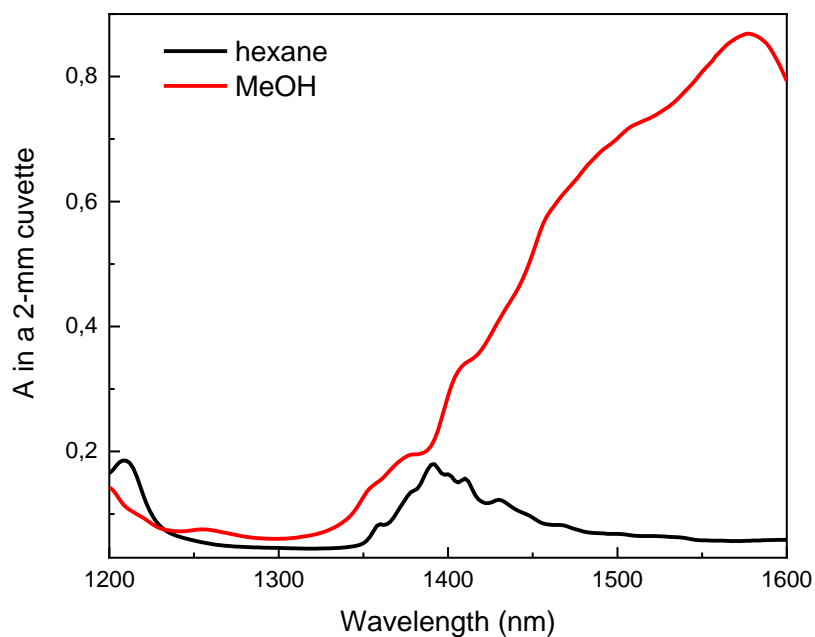

**Fig. S2** The steady-state absorption spectrum of the solvents in the NIR spectral region.

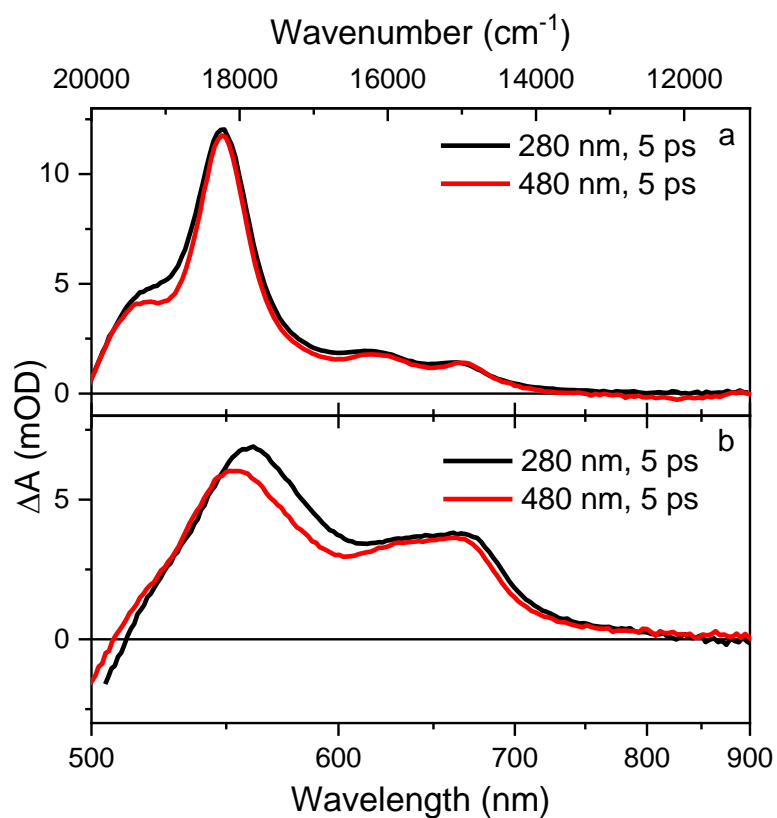

**Fig. S3** Comparison of TA spectra after 280 and 480 nm excitation in (a) *n*-hexane and (b) methanol.

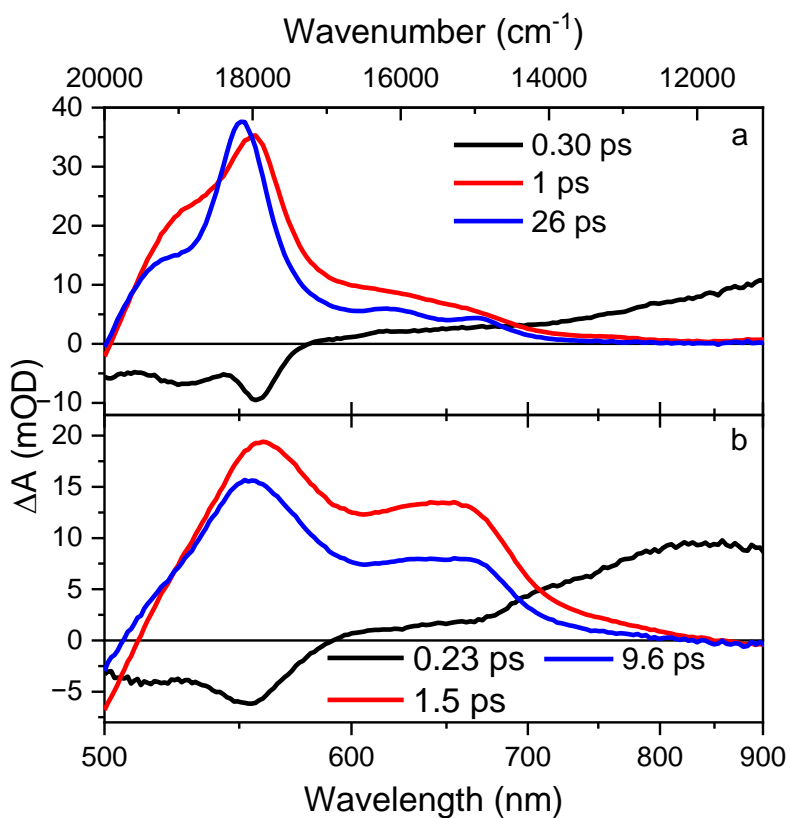

**Fig. S4** EADS obtained from global fitting of transient absorption data of  $\beta$ -apo-8'-carotenal in *n*-hexane (a), and methanol (b) after 280 nm excitation.
